# Supplementary material for: Quadruple hydrogen bonds and thermo-triggered hydrophobic interactions generate dynamic hydrogels to modulate transplanted cell retention
Source: Royal Society of Chemistry journal article supplement (doi:10.1039/c9bm00052f), 2019-01-01
Supplement: c9bm00052f1.pdf [file c9bm00052f1.pdf]

## Supporting Information

### Quadruple hydrogen bonds and thermo-triggered hydrophobic interactions generate dynamic hydrogels to modulate transplanted cell retention

Sa Liu,<sup>a, c, d</sup> Dawei Qi,<sup>a, c</sup> Yunhua Chen,<sup>\* a, c, d</sup> Lijing Teng,<sup>b, c</sup> Yongguang Jia<sup>a, c, d</sup> and Li Ren<sup>\* a, c, d</sup>

<sup>a</sup> School of Materials Science and Engineering, South China University of Technology, Guangzhou 510640, China.

<sup>b</sup> School of Medicine, South China University of Technology, Guangzhou 510006, China.

<sup>c</sup> National Engineering Research Center for Tissue Restoration and Reconstruction, South China University of Technology, Guangzhou 510006, China.

<sup>d</sup> Key Laboratory of Biomedical Engineering of Guangdong Province, South China University of Technology, Guangzhou 510006, China

Email: msyhchen@scut.edu.cn; psliren@scut.edu.cn

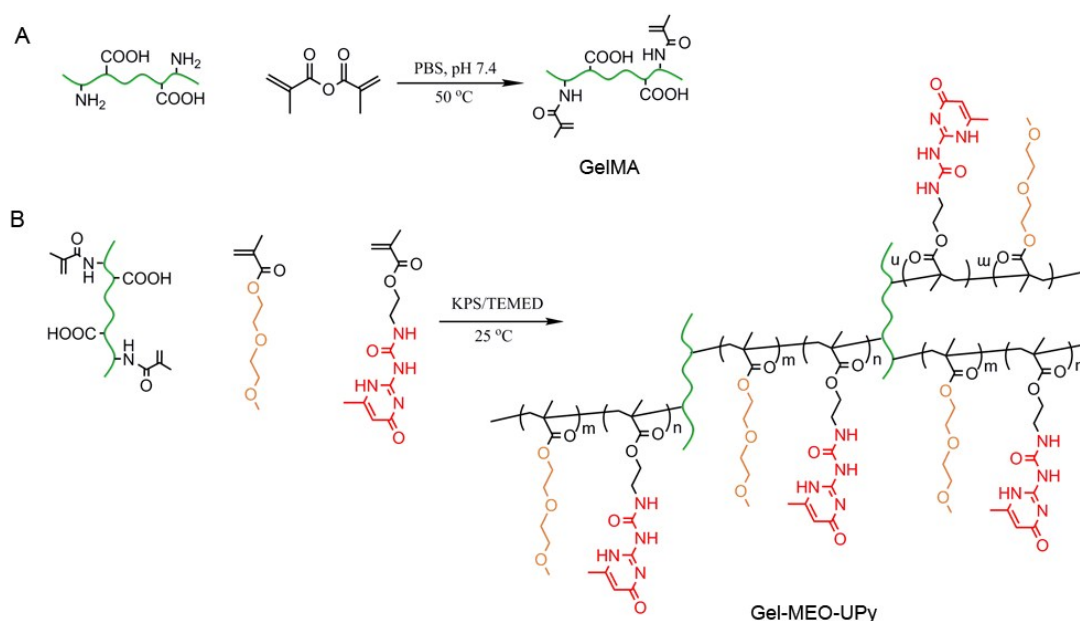

**Fig. S1** The synthesis route of (A) GelMA, and (B) branched supramolecular polymer Gel-MEO-UPy by one-pot free radical polymerization.

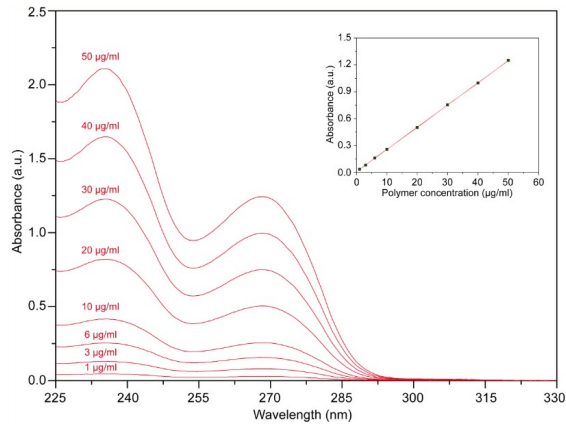

**Figure S2.** UV spectra of UPyMA monomer at different concentrations.

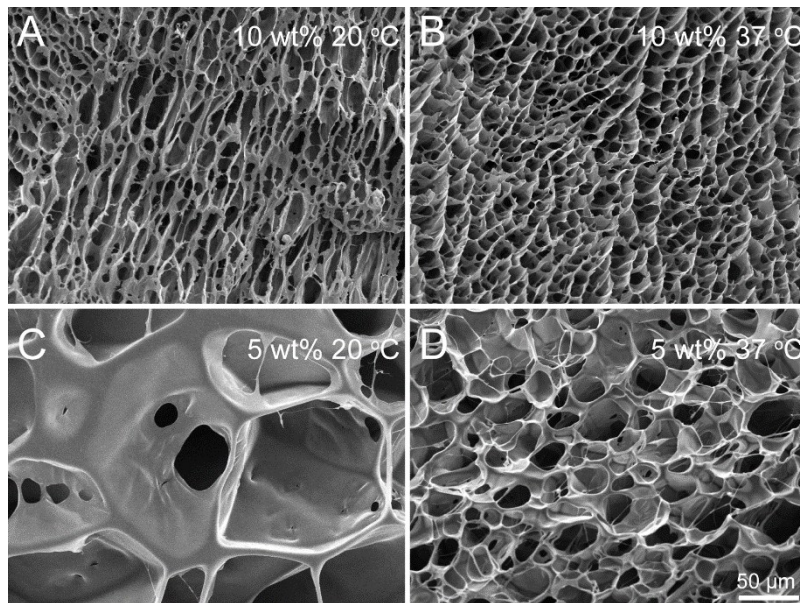

**Figure S3.** SEM images of lyophilized 5 wt% and 10 wt% Gel-MEO-UPy hydrogels after being incubated at different temperatures.

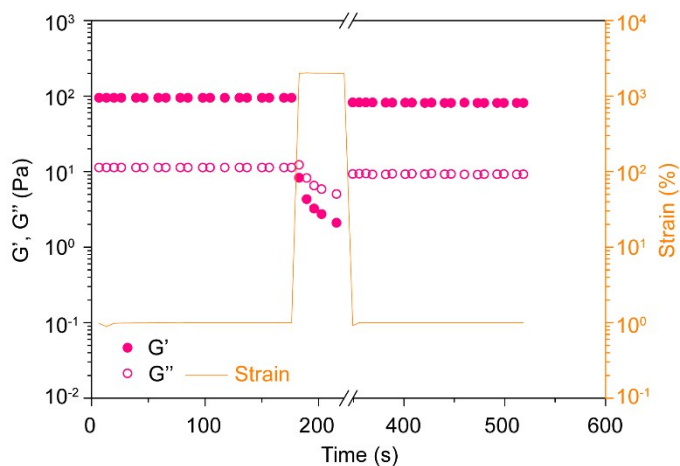

**Figure S4.** Cyclic strain sweep measurement of 10 wt% Gel-MEO-UPy hydrogel with applied oscillatory strain being alternated between 1% and 2000% at 37 °C, with introducing resting time 2 min before applying the 1% strain sweep.

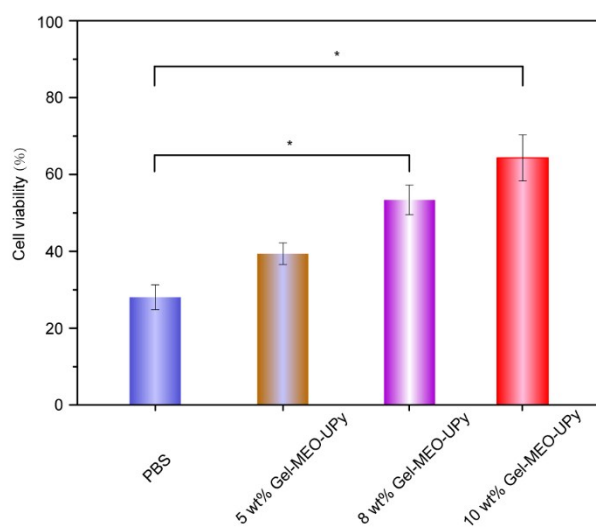

**Figure S5.** The viability of BMSCs in the supramolecular polymer solutions with varied concentrations after syringe injection (22 Gauge) at 20 °C, \* refers  $p < 0.05$ .
